# Supplementary material for: The role of ecosystem engineers in shaping the diversity and function of arid soil bacterial communities
Source: Copernicus journal article supplement (doi:10.5194/soil-2021-29), 2021-04-15

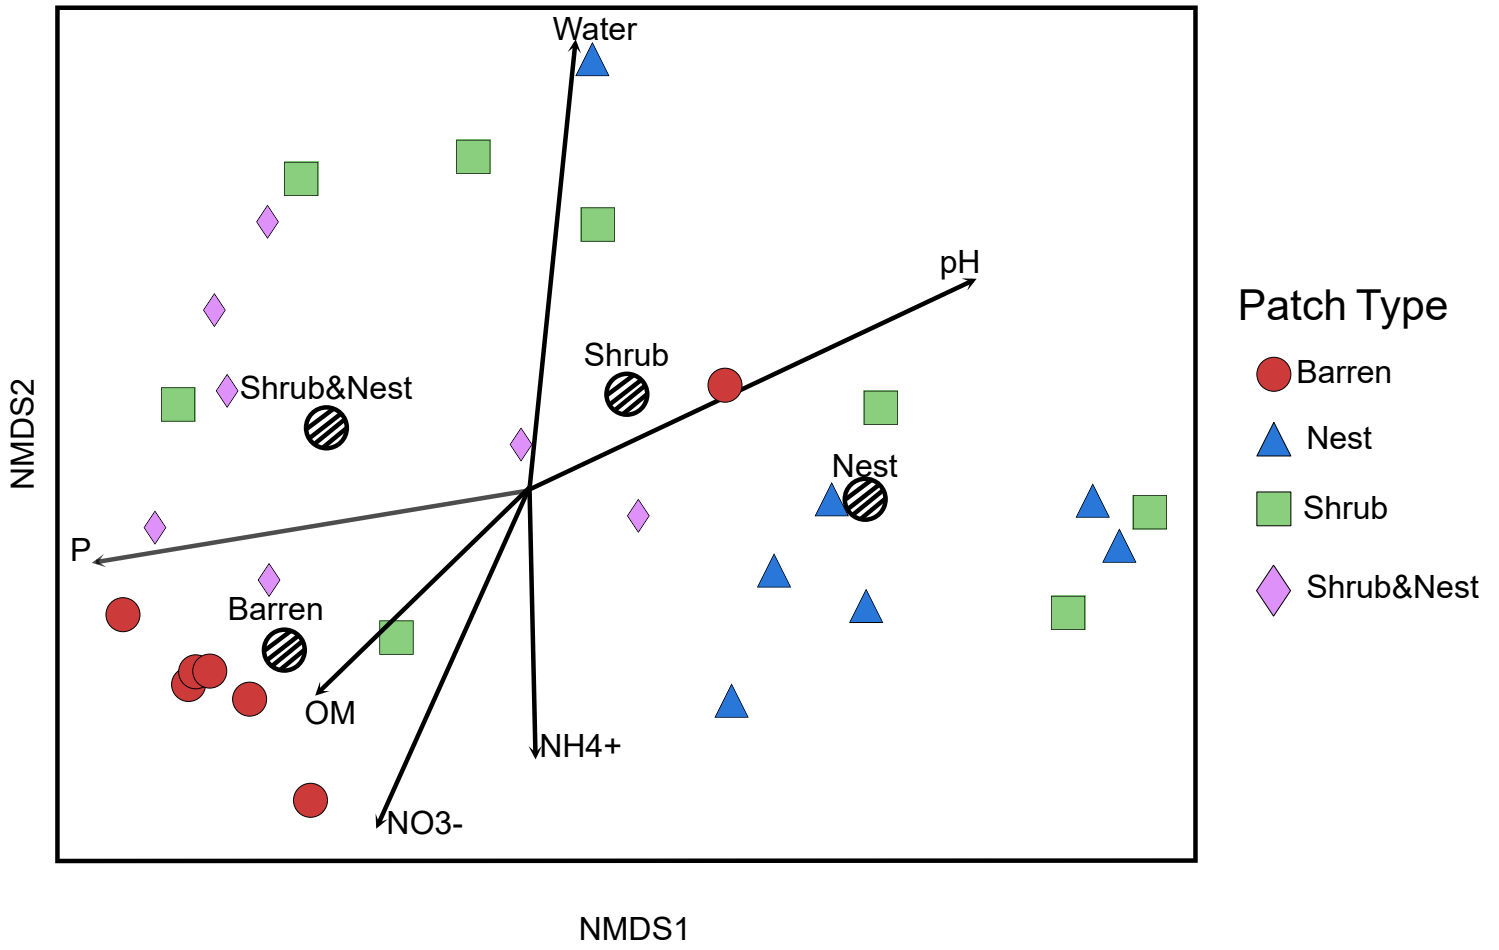

Supplement: Supplementary file [file soil-2021-29-AC1-supplement.pdf]
